# Supplementary material for: Dietary dicarbonyl compounds exacerbated immune dysfunction and hepatic oxidative stress under high-fat diets in vivo
Source: Royal Society of Chemistry journal article supplement (doi:10.1039/d3fo05708a), 2024-01-01
Supplement: d3fo05708a1.pdf [file d3fo05708a1.pdf]

**Supplemental Table S1.** Comparison of the ingredients in #D12450J (STD) and high-fat diet (HFD).

| Ingredients         | STD (10% dietary fat) |        | HFD (60% dietary fat) |        |
|---------------------|-----------------------|--------|-----------------------|--------|
|                     | g                     | kcal   | g                     | kcal   |
| Casein              | 200                   | 800    | 200                   | 800    |
| L-cystine           | 3                     | 12     | 3                     | 12     |
| Corn starch         | 506.2                 | 2024.8 | 0                     | 0      |
| Maltodextrin 10     | 125                   | 500    | 125                   | 500    |
| Sucrose             | 72.8                  | 291.2  | 72.8                  | 291.2  |
| Cellulose, BW200    | 50                    | 0      | 50                    | 0      |
| Soybean oil         | 25                    | 225    | 25                    | 225    |
| Lard                | 20                    | 180    | 245                   | 2205   |
| Mineral mix s10026B | 50                    | 0      | 50                    | 0      |
| Vitamin mix V10001C | 1                     | 4      | 1                     | 4      |
| Choline bitartrate  | 2                     | 0      | 2                     | 0      |
| FD&C red dye #40    | 0                     | 0      | 0                     | 0      |
| FD&C yellow dye #5  | 0.04                  | 0      | 0                     | 0      |
| FD&C blue dye #1    | 0.01                  | 0      | 0.05                  | 0      |
| Total               | 1055.05               | 4037   | 773.85                | 4037.2 |

**Supplemental Table S2.** Selected DEGs in HF-MGO and HF-GO groups and their enriched KEGG pathways.

| Group               | Gene name | Log <sub>2</sub> FC | p-value                                                                | KEGG pathways                                                                                                                         |
|---------------------|-----------|---------------------|------------------------------------------------------------------------|---------------------------------------------------------------------------------------------------------------------------------------|
| <b>HF-MGO vs HF</b> | Gadd45g   | 4.86                | 0.000                                                                  | MAPK signaling pathway, Apoptosis, FoxO signaling pathway                                                                             |
|                     | Ddit4     | 8.01                | 0.000                                                                  | Autophagy, PI3K-Akt signaling pathway, mTOR signaling pathway                                                                         |
|                     | Fgf21     | -8.93               | 0.001                                                                  | MAPK signaling pathway, PI3K-Akt signaling pathway                                                                                    |
|                     | Ngf       | -2.67               | 0.002                                                                  | MAPK signaling pathway, Apoptosis, PI3K-Akt signaling pathway                                                                         |
|                     | Prkacb    | 2.63                | 0.002                                                                  | MAPK signaling pathway, Autophagy, Insulin signaling pathway                                                                          |
|                     | Gadd45b   | 7.02                | 0.004                                                                  | MAPK signaling pathway, Apoptosis, FoxO signaling pathway                                                                             |
|                     | Flt1      | 3.64                | 0.006                                                                  | MAPK signaling pathway, PI3K-Akt signaling pathway, HIF-1 signaling pathway                                                           |
|                     | Tgfb1     | 7.39                | 0.019                                                                  | MAPK signaling pathway, NAFLD, AGE-RAGE signaling pathway in diabetic complications, FoxO signaling pathway                           |
|                     | Ndufv1    | 1.81                | 0.026                                                                  | NAFLD, Alzheimer disease, Oxidative phosphorylation                                                                                   |
| <b>HF-GO vs HF</b>  | Prkca     | 4.35                | 0.038                                                                  | MAPK signaling pathway, AGE-RAGE signaling pathway in diabetic complications, PI3K-Akt signaling pathway                              |
|                     | Gadd45g   | 4.13                | 0.000                                                                  | MAPK signaling pathway, Hepatocellular carcinoma, Apoptosis, FoxO signaling pathway                                                   |
|                     | Ndufb6    | 6.28                | 0.000                                                                  | NAFLD, Alzheimer disease, Oxidative phosphorylation, Parkinson disease                                                                |
|                     | Tgfb1     | 7.30                | 0.000                                                                  | NAFLD, AGE-RAGE signaling pathway in diabetic complications, MAPK signaling pathway, Hepatocellular carcinoma, FoxO signaling pathway |
|                     | Tgfb2     | 7.10                | 0.001                                                                  | AGE-RAGE signaling pathway in diabetic complications, MAPK signaling pathway, Hepatocellular carcinoma, FoxO signaling pathway        |
| mt-Co3              | -1.76     | 0.007               | NAFLD, Alzheimer disease, Oxidative phosphorylation, Parkinson disease |                                                                                                                                       |

|                        |         |       |       |                                                                                     |
|------------------------|---------|-------|-------|-------------------------------------------------------------------------------------|
| <b>HF-GO<br/>vs HF</b> | mt-Co2  | -1.54 | 0.008 | NAFLD, Alzheimer disease, Oxidative phosphorylation, Parkinson disease              |
|                        | Gadd45b | 7.10  | 0.009 | MAPK signaling pathway, Hepatocellular carcinoma, Apoptosis, FoxO signaling pathway |
|                        | mt-Cytb | -1.19 | 0.013 | NAFLD, Alzheimer disease, Oxidative phosphorylation, Parkinson disease              |
|                        | Uqcrl1  | 2.81  | 0.022 | NAFLD, Alzheimer disease, Oxidative phosphorylation, Parkinson disease              |
|                        | Col4a6  | 5.92  | 0.028 | AGE-RAGE signaling pathway in diabetic complications, PI3K-Akt signaling pathway    |

DEGs, differentially expressed genes.

**Supplemental Figure S1.** Changes in FBW (a) and FBG (b) levels in mice fed a normal diet interfered by  $\alpha$ -DCs.

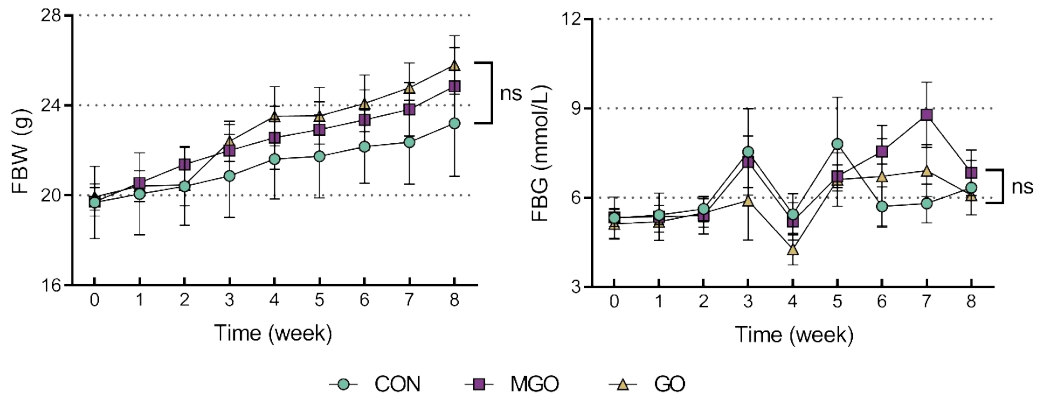

Data were presented as the mean  $\pm$  SD ( $n = 6$ ) and values with different letters indicate statistical difference at  $p < 0.05$  (Tukey's test). FBW, fasting food weight; FBG, fasting food glucose.

**Supplemental Figure S2.** Serum levels of IL-1 $\beta$ , IL-6, and MIP-1 $\alpha$  in mice fed a normal diet interfered by  $\alpha$ -DCs.

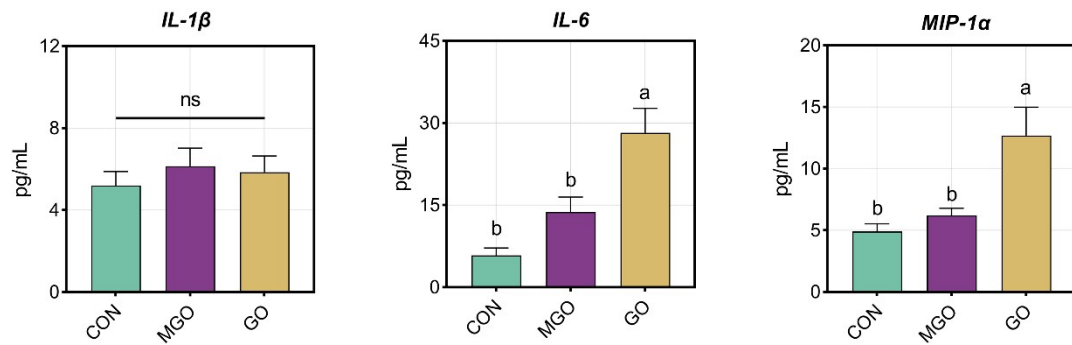

Data were presented as the mean  $\pm$  SD ( $n = 5$ ) and values with different letters indicate statistical difference at  $p < 0.05$  (Tukey's test). IL-1 $\beta$ , interleukin-1 $\beta$ ; IL-6, interleukin-6; MIP-1 $\alpha$ , macrophage inflammatory protein-1 $\alpha$ .

**Supplemental Figure S3.** Morphological changes (a), hepatic MDA and ALT levels (b) in mice fed a normal diet interfered by  $\alpha$ -DCs.

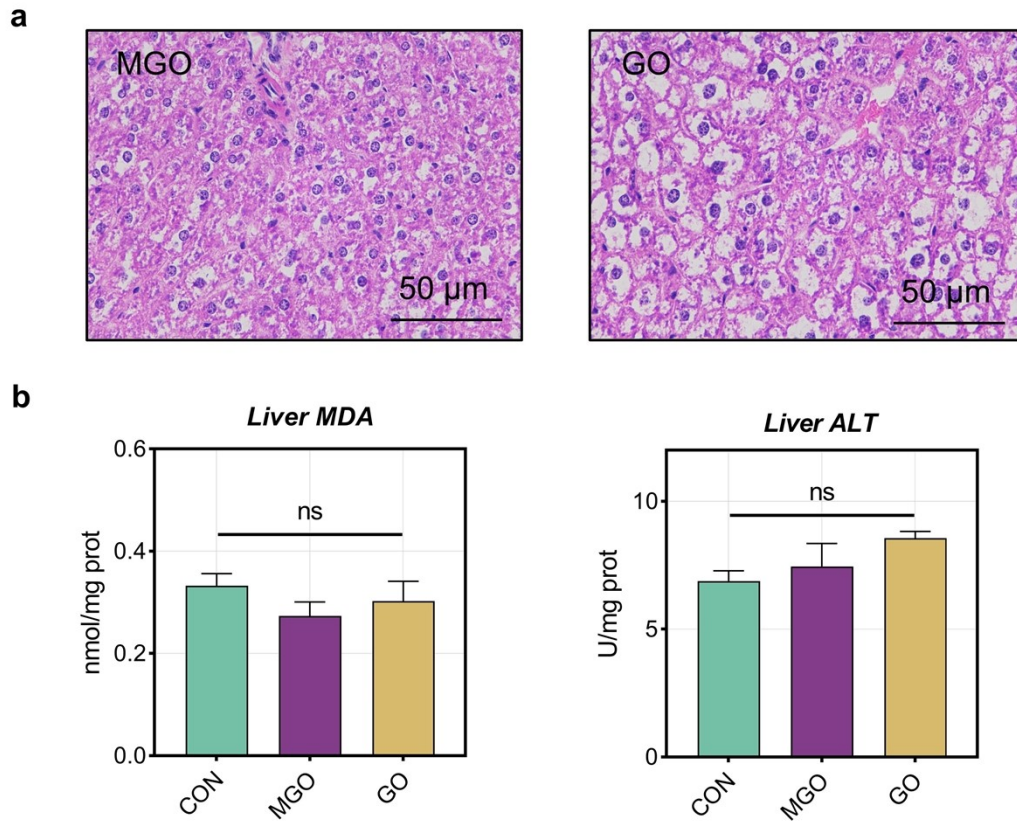

Data were presented as the mean  $\pm$  SD ( $n = 6$ ) and values with different letters indicate statistical difference at  $p < 0.05$  (Tukey's test). MDA, malondialdehyde; ALT alanine transaminase.

**Supplemental Figure S4.** Total OTUs,  $\alpha$ -diversity indices (a), and relative abundance of *Fusobacterium* (b) in mice fed a normal diet interfered by  $\alpha$ -DCs.

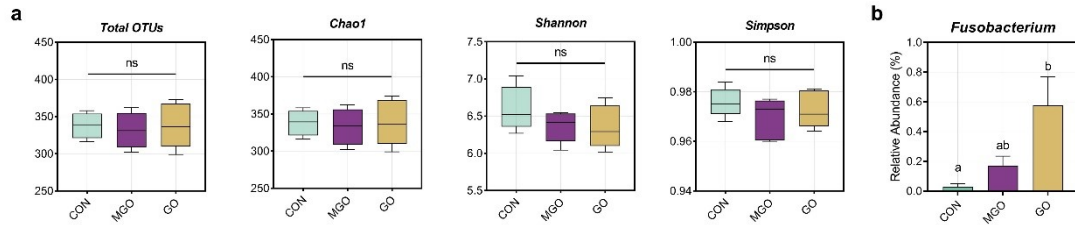

Data were presented as the mean  $\pm$  SD ( $n = 5$ ) and values with different letters indicate statistical difference at  $p < 0.05$  (Tukey's test).

**Supplemental Figure S5.** Relative abundance of dominant bacteria at the phylum level.

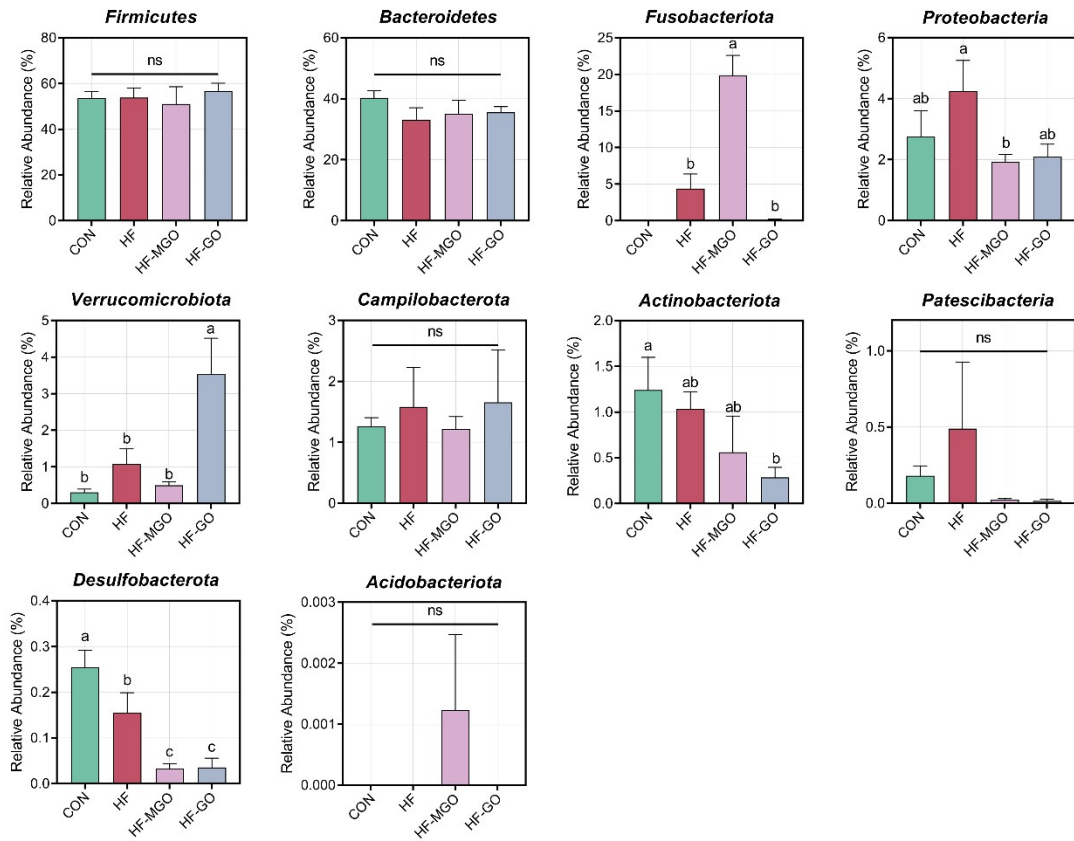

Data were presented as the mean  $\pm$  SD (n = 5) and values with different letters indicate statistical difference at  $p < 0.05$  (Tukey's test).



**Supplemental Figure S6.** Relative abundance of dominant bacteria at the genus level.

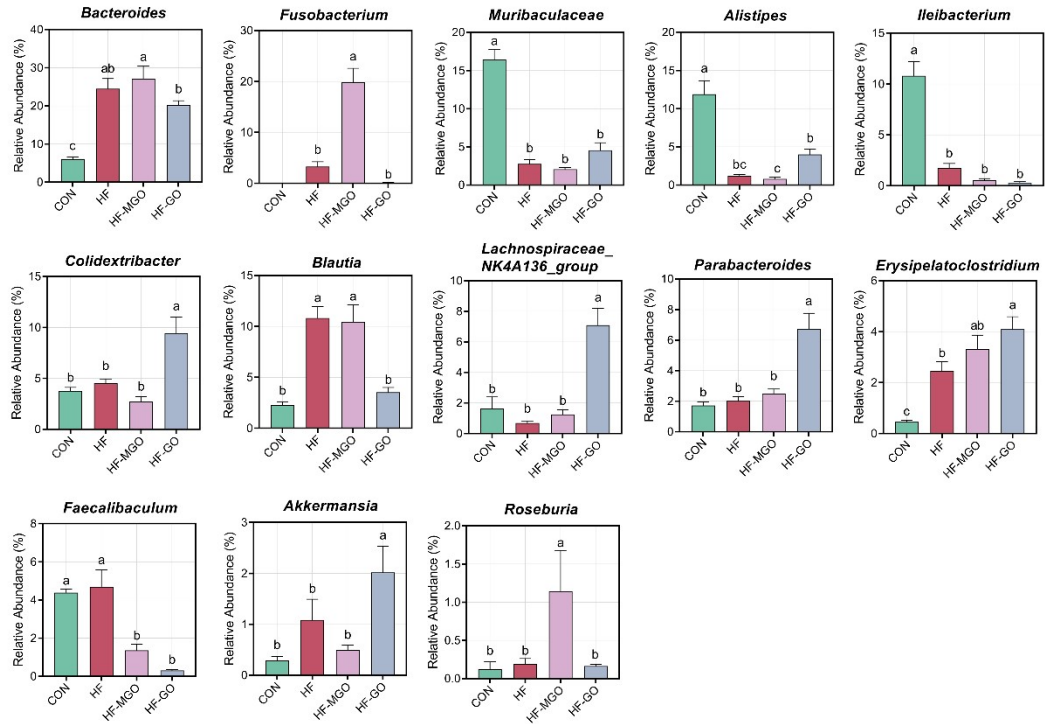

Data were presented as the mean  $\pm$  SD (n = 5) and values with different letters indicate statistical difference at  $p < 0.05$  (Tukey's test)
